# Supplementary material
Source: publisher figshare collection journal article supplement (https://sage.figshare.com/ndownloader/files/18004919)
Supplement: Supplementary file 1 [file 18004919]

## Sheet: ECHO
timetoDeathFU	death	gestational_age_at_birth	Gadx	GAatECHO	DxtoECHOdays	EchotoTx(PosAfter)	OnTxatECHO	weight_at_echo_kg_v2	height_at_echo_v2	bsa_at_echo_v2	sys_blood_pressure_systemic_v2	dias_blood_pressure_systemic_v2	sf_v2	lv_rv_Diasratio	ef_by_a4c_v2	ef_5_6_method_v2	edv_4c_lv_v2	esv_4c_lv_v2	dp_dt_of_rv_v2	trSYS_Dias_duration	sPAP_PDA_TR	sPAP_sBP	presence_of_left_to_right_v2	direction_of_pfo_asd_v2	eccentricity_index_v2	lv_rv_sysratio	rv_lv_ratio	rvet_v2	ivct_v2	ivrt_rv_v2	mpi_by_tdi_of_tricuspid_va_v2	lvet_v2	ivct_lv_v2	ivrt_lv_v2	mpi_by_tdi_of_mv_v2	tapse_by_surface_area_mm_v2	tapse_z_score_v2	tapseless2	e_a_ratio_of_tric_valve_v2	s_by_tdi_of_tv_v2	e_of_tv_by_tdi_v2	e_e_v2	e_a_of_mv_by_pw_v2	s_of_mv_lat_by_tdi_v2	e_of_mv_lat_by_tdi_v2	e_e_of_mv_v2	s_of_mv_septal_by_tdi_v2	e_of_mv_septal_by_tdi_v2	mv_z_score_v2
5172	0	32	188.143	194.571	45	-26	1	18.5	97	0.68	103	57	35.7	1.69903	67	70.8	15.69	47.62	697	1.45766	62	60.1942	0	1	0.99	1.26316	0.791667									17.2	-0.15	0	1.2										0.5
634	0	25.29	41.8614	41.8614	0	2	0	2.6	41	0.16	80	39		0.970149	75	60.1	0.75	3.03	2025	3	136	170	0	4	2.86	0.353293	2.83051	161	52.8	66	0.76	161	42	63	0.69	6.6	-2.14	1	1	0.07	0.15		1	0.06	0.11	9.27	0.04	0.08	1.88
983	0	24.71	45.8529	46.1386	2	5	0	3.5	49	0.21	85	56	46.1	0.951351	75	67.1	1.46	3.81	757	3.94805	65	76.4706	1	2	1.7	0.468208	2.1358									8.1	-0.86	0	1.54	0.1	0.13	6.1	1	0.07	0.1	8.4	0.05	0.07	0.05
900	0	23.71	102.139	102.139	0	8	0	10.9	81	0.5	118	58	32	2.80357	68.6	72.1	9.6	30.6		1.35618	107	90.678	1	1	1.17	0.791855	1.26286	232	52.5	55.25	0.47					11.7	-2.53	1	1	0.17	0.28	3.64	1	0.11	0.2		0.08	0.17	1.7
721	1	28	42.1429	56.8571	103	-103	1	5.27	58	0.3	69	39	54.1	1.43704	82.3	82.6	1.1	6.2		2.08331	60	86.9565	1	2	2.13	0.445255	2.2459									7.8	-3.53	1					0.88						-0.25
1216	0	23	55.5714	55.7143	1	4	0	4.48	60	0.28	87	56	43.4	0.558952	65		2.13	6.09	1346	2.81899	83	95.4023	1	2	0.18	1.31183	0.762295	182.22	23.8	97.7	0.71	190	55.46	95.07	0.82				1	0.07	0.09	9.56	1	0.06	0.06	13	0.05	0.09	-0.24
1641	0	25.29	40.5757	43.5757	21	10	0	3.85	49	0.23	109	68	57.4	2.77273	64.6	64.7	2.38	6.72	1010	0.305263	79	72.4771	0	1	0.58	0.863309	1.15833	171.65	29.05	36.97	0.4	164	52.8	39.61	0.55	10	0.77	0	1	0.13	0.24	3.71	1	0.07	0.16	5.88	0.05	0.1	-0.65
1660	0	27.71	58.2814	58.2814	0	13	0	6	57.5	0.32	97	43			72		2.41	8.61		1.84612			0	4	1.95	0.715447	1.39773	166.83	37.54	45.88	0.53					7.9	-3.47	1	1	0.08	0.07	11.6	0.67						0.57
1449	0	27.71	46.1386	50.5671	31	-31	1	3.6	52.5	0.23	113	58	45.1	1.62963	67.2	74	1.72	5.25		2.0351				4	3.64	0.794521	1.25862	162.66	50.05	100.1	0.92	162.66	37.54	75.08	0.67	5.5	-4.12	1	1	0.07	0.09	8	1	0.05	0.07	8.6	0.04		-1.07
193	1	30.71	39.2814	41.4243	15	-2	1	3.31	49	0.22	76	33	37	1.82883	60.4	62.8	4.66	11.77		3.12877	69	90.7895	1	2	1.96	0.809091	1.23596									7.2	-1.63	0	1				1						-0.46
2591	0	27	41.1429	41.5714	3	7	0	3.3	50	0.22	74	49	40.5	1.70732		66				1.94247	62	83.7838	1	2	1.38	1.27174	0.786325									6.6	-2.14	1					0.72						-0.04
3082	0	31	42.8571	54.2857	80	-69	1	5.55	60	0.29	78	47	59.8	1.67213	77.9	72	2.17	9.29		2.87712	82	105.128	1	2	2.15	0.692308	1.44444									11	-1.4	0	1				0.94						0.73
1370	1	29	61.2857	63	12		0	3.9	44	0.25	88	35	36.4	3.11111	63.1	59	2.35	6.38	1535	2.34494	92	104.545	0	1	1.49	0.836158	1.19595									6.4	-4.47	1	0.63				1	0.05	0.1	7.2			-0.65
4105	0	25.14	56.5686	58.4257	13	-13	1	3.64	46	0.2	89	50	48.6	2.58824	64.2	62.5	2.54	7.09		1.75614	43	48.3146	0	1	1.02	1.39326	0.717742									9.8	-1.12	0	0.51				1.27						0.64
4435	0	24	54.8571	54.8571	0		0	5.27	65	0.3	90	47	45		53		3.7	13.5	1535	3.04347	89	98.8889	1	2												11.2	-1.27	0					1						1.03
415	0	24.43	38.8586	38.8586	0	10	0	2.55	36	0.17	82	44	40.5	1	64.5	67	1.26	3.55	1652	3.18862	75	91.4634	0	4	1.59	0.795082	1.25773					181.33	52.82	80.98	0.73	11.8	2.31	0	0.79				1	0.07	0.06	19	0.05	0.04	0.89
537	0	25	50	50	0	2	0	4.3	53	0.24	74	59	42.6	0.615385	69.7	69.7	1.98	6.54	433	3.33333	68	91.8919	1	2		0.2723	3.67241	174.29	36.97	89.79	0.42	235.03	58	139.96	0.84	10.2	-0.84	0	1	0.07	0.1	7.5		0.03	0.07		0.04	0.03	-1.18
573	0	26.57	41.7129	41.9986	2	50	0	3.26	47	0.21	74	42	60.2	1.44898	72.2	72.7	1.36	4.9		2.74997	71	95.9459	0	4	2.12	0.526786	1.89831	153.17	42.25	97.71	0.84	161.09	44.89	42.25	0.54	6.3			1	0.07	0.2	5.4	1	0.08	0.1	7.1	0.05	0.08	1.55
180	1	25.28	40.9943	40.9943	0	1	0	2.88	46	0.2	70	40	50	0.809524	73.8	69.1	0.71	2.71	1731	4.24992	123	175.714	0	4	3.63	0.380282	2.62963									6.2	-2.49	1					1						-1.16
676	0	28.71	39.2814	39.2814	0	76	0	2.71	46	0.19	89	47	39.7	1.84884	71.2	68.8	1.44	5	1010	2.1831	68.2	76.6292	1	2	1.68	1.22951	0.813333	179.57	50.18	68.66	0.68	163.73	47.53	71.3	0.73	10.5	1.2	0	1	0.07	0.16	5.44	1	0.06	0.12	8	0.05	0.07	1.7
590	1	23.43	39.2871	39.2871	0	56	0	2.13	44	0.16	64	34	40.5	1.75	77.3	80.7	0.76	3.35		2.8648			1	2	1.58	1.07895	0.926829	153.17	29.05	66.02	0.6	150.53	44.89	47.53	0.6	7.9	-1.03	0	1	0.09	0.13	7.54	1	0.05	0.06	10.5	0.05	0.05	0.35
751	0	25.28	33.9943	34.4229	3		0	1.063	34	0.1	63	37		1.43373	56	55.7	0.95	2.16		2.86105			1	2	1.65	0.857143	1.16667	169.01	34.33	18.49	0.31	145.24	26.41	52.82	0.58	7.4	0	0	0.84	0.1	0.1	7.6	0.84	0.04	0.04	17.5	0.05	0.04	0.03
817	0	26	47	47	0	4	0	3.9	49	0.24	103	61	44.2	1.11628	66.5	64.8	1.54	4.61	1346	3.60023	84	81.5534	1	4	2.4	0.404255	2.47368					166.37	31.69	68.66	0.59	7.3	-2.86	1	1				1	0.06	0.12	13.25	0.04	0.08	-1.49
824	0	26.86	35.0029	35.0029	0		0	1.6	39	0.12	74	40	50.7	1.06612	68.7	66.7	0.84	2.68		2.05185			1	2	1.53	0.731481	1.36709	147.88	42.25	58.1	0.73	174	36.97	63.38	0.56	9.5	-1.33	0	1	0.09	0.07	11.1	0.81	0.05			0.04	0.07	-1.23
166	1	23.28	38.28	38.28	0	56	0	3	47	0.2	84	51	33.7	1.04167	53	57.1	1.73	3.7		3.32275	87	103.571	0	1	2.22	0.604651	1.65385									5.8	-2.83	1	1				1						1.18
895	0	24.14	32.14	51.5686	136		0	4.07	51	0.25	68	36	51.4	1.93043	64.2	69	2.53	7.08		2.61915	42	61.7647	0	1	1.87	1.00943	0.990654									12.6	0.84	0					1						-0.12
1191	0	32	60.8571	60.8571	0		0	7.56	66	0.38	81	39	38.4		65	66.3	6.4	18.31		1.9804	40	49.3827		2	1.88			174.29	47.53	29.05	0.41	161.09	21.13	63.38	0.5	13.4	-1.4	0	1	0.11	0.17	7.06	1	0.11	0.16	7.94	0.09	0.12	-1.26
214	0	26.43	45.7157	54.5729	62	-56	1	3.85	48	0.21	70	36	41	1.29104	59.5	54.7	2.31	5.7		2.19355			1	2	1.73	1.26966	0.787611	184.86	47.53	58.1	0.56	163.73	31.69	81.36	0.66	10	-0.98	0	1	0.1	0.09	12.1	0.8	0.05	0.05	13.8	0.05	0.06	0.26
1405	0	23	36.2857	38.7143	17		0	2.38	40	0.17	76	56	30.1	1.71134	59.8	61.8	2.12	5.28		1.89357	53	69.7368	0	1	1.19	1.07018	0.934426	139.96	68.66	50.18	0.46	158.45	50.18	42.25	0.55	8.4	-0.6	0	1	0.11	0.17	6.8	1	0.05	0.06	13.7	0.06	0.06	-0.38
167	1	26.43	38.43	44.7157	44	-40	1	2.1	41	0.16	75	48	40.9	1.24	61.8	53.6	1.43	3.74	1514	2.68571	68	90.6667	0	4	1.99	0.715596	1.39744	145.24	29.05	73.94	0.43	166.37	34.33	42.25	0.33	5.9	-3.84	1	1	0.08	0.15	5.33	1	0.05	0.12	7.58	0.05	0.09	-0.39
735	0	27.57	57.8557	66.4271	60		0	7.5	63.5	0.37	90	45	41.6	0.926087	67.9	74.7	3.76	11.72	1053	1.63637	64	71.1111	1	2	1.23	1.27273	0.785714									14.9	0.32	0					1.32						1.14
184	1	25.28	39.1371	39.1371	0	23	0	2.16	43	0.16	84	36	46.5	1.54783	70.4	69.7	1.82	6.15		2.64007	89	105.952	0	4	2.18	0.693694	1.44156	180.74	33.37	63.95	0.32	166.83	55.61	58.39	0.69	5.6	-3	1	1	0.07	0.11	9.72	1	0.06	0.08	12.38	0.04	0.07	0.9
1434	0	24.28	38.5657	38.5657	0		0	2.8	40	0.18	82	59	44.7	1.13571	57.8	58.7	2.1	4.98		4.89302			1	2	0.37	0.885496	1.12931									12.7	3.09	0	1				0.77						0.63
1568	0	24.28	37.9943	37.9943	0		0	2.2	39	0.16	67	23	40.1	1.04918	63.9	60	1.7	4.6		2.16125	50	74.6269	1	2	2.13	0.724138	1.38095	200.2	25.03	54.22	0.42	166.83	50.05	66.73	0.68	9.4	0.26	0	1	0.11	0.18	3.8	0.75	0.06	0.07	11.7	0.04	0.06	1.64
117	1	30.14	37.14	37.14	0	36	0	2.1	40.5	0.16	70	41	54.5	1.89231	69.9	76.6	0.59	1.96		2.80004	71	101.429	1	2	3.22	0.652174	1.53333									5.7	-2.91	1	1				0.89						-0.3
513	0	24.86	40.1457	48.4314	58	-58	1	3.3	57	0.22	77	56	44.1	1.72727	63.5	64.9	1.69	4.3	576	2.91306	62	80.5195	0	4	2.27	0.585034	1.7093									4.6	-4.74	1	0.67				0.7						-0.57
150	1	26.43	37.1443	37.1443	0	22	0	2.38	51	0.18	80	50	37.9	1.07317	74	68.2	0.59	2.3		2.28004	96	120	0	4	2.37	0.5	2	153	47.27	50.05	0.62	164	41.71	36.15	0.51	8.8	-0.26	0	1	0.09	0.18	4.56	0.71	0.07	0.15	4		0.16	-1.07
296	1	27.43	60.5729	64.8586	30	-3	1	6.94	60	0.36	106	74	60	2.43836	67.4	73.3	3.75	11.52	639	1.08748	111	104.717	0	4	2.1	0.646018	1.54795	266.93	30.59	66.73	0.26	253.03	41.71	77.86	0.31	13.5	0.27	0	0.83	0.08	0.08	5.5	1.8	0.07	0.11	6.54			0.93
234	1	27	50.1429	50.1429	0	5	0	4.2	51	0.23	88	67	48.6	1.46809	67.9	68.9	1.3	4.1		1.74192			1	2	2.85	0.468468	2.13462	137.64	29.2	66.73	0.7					7.5	-2.72	1	0.63	0.13	0.2	2.95	0.57	0.04			0.04	0.05	0.2
444	1	23.86	42.0029	42.0029	0	36	0	3.3	56	0.22	92	66	46.8	1.02825	68.8	72	1.99	6.38	1918	3.44989	85	92.3913	0	4	1.72	0.462366	2.16279					158.49	54.22	50.05	0.61	6.4	-2.31	1					1.26	0.08	0.11	9.82	0.06	0.14	-0.24
228	1	25.14	35.5686	42.7114	50	-50	1	3.6	53	0.23	77	36	45.5	1.1	65.7	63.9	1.02	2.97		1.66667			1	2	2.37	0.648148	1.54286									7.3	-1.54	0					0.77						-1.65
291	1	28	39.2857	51.4286	85	-85	1	3	50.5	0.2	60	33	56	1.12057	74.6	72.9	0.7	2.76					1	2	2.42	0.592308	1.68831									4.4	-4.88	1					1.21						-0.25
3902	0	28	79.1429	79.1429	0		0	5.9	59	0.29	105	70	40.6	1.01266	67.32	71.5	3.32	10.19		2.63588	98	93.3333	0	4	2.31	0.547297	1.82716									15.1	0.45	0	0.88				0.83						-1.27
150	1	27.85	38.4214	38.4214	0		0	1.69	57	0.14	66	40	44.8	1.85106		73.3				2.06249			1	2		0.94186	1.06173									6	-2.66	1	0.7				0.71						1.18
3577	0	28	57.7143	57.7143	0		0	4.6	60	0.27	80	64								3.22722	70	87.5	1	2	3.72	0.302326	3.30769									14.1	0.67	0											-0.55
4817	0	24.57	38.2843	38.2843	0		0	2.77	55	0.2	80	49	45.7	7.7037	73.2	63	1.62	6.04	1918	2.06904	49	61.25	0	1	1.27	1.66129	0.601942									10.7	1.37	0					0.81						0.95
1114	0	27.86	41.5743	41.7171	1		0	1.92	37	0.14	95	53	37.8	1.54639	73.4	71.8	0.88	3.31		1.47273			1	2		0.955556	1.04651	151	31.69	50.18	0.33	161.09	29.05	58.1	0.53	9.5	0.34	0	0.99	0.1	0.13	6.46	0.95	0.05	0.05	12.2	0.05	0.05	-0.76
1478	0	23.86	45.1457	45.1457	0		0	3.54	49.5	0.22	88	43	38.6	4.16327	64.6	61.9	2.42	6.84	3030	2.3404	47	53.4091	0	4	1.12	2.06349	0.484615	190.14	52.82	50.18	0.53	166.37	50.2	66.02	0.68	13.3	1.33	0		0.14	0.16		1.11	0.07	0.09	10.9	0.08	0.12	0.81
226	0	24.86	38.5743	39.86	9		0	3.23	48	0.2	105	56	41.5	1.43846	56.9	53.2	2.68	6.22			110	104.762	0	4	1.94	0.628931	1.59	184.86	36.97	31.69	0.36	142.6	58.1	76.58	0.93	11.7	2.23	0	1	0.11	0.19	5.37	1	0.06	0.13	7.31			0.26
2746	0	27.86	33.7171	33.7171	0		0	1.29	38.5	0.11	71	40	30.6	1.35	62	65.6	0.81	2.13		1.87495	52	73.2394	0	4		0.878788	1.13793	179.35	20.85	54.22	0.4	175	37.54	79.25	0.6	8.8	2	0		0.07	0.08		1	0.06	0.11	7.18	0.05	0.08	-0.02
533	0	23.14	42.8543	42.9971	1	161	0	2.26	44	0.17	63	49	37.1	1.6055	71.9	73.6	1.4	4.99		2.14281			0	4	2.22	0.589744	1.69565	134.68	36.97	68.66	0.78	187.5	26.41	63.38	0.45	10.6	1.29	0	1	0.17	0.12	8.17	0.65	0.06	0.06	9.17	0.06	0.05	-0.65
101	0	27.14	35.8543	35.9971	1		0	1.134	42	0.11	71	31	45.5	0.892857	61.6	56.7	0.99	2.58		2.38596	49	69.0141	1	2	1.77	1.05714	0.945946									9.8	0.6	0	1				1						1.84
[truncated: 73 more columns]
